# Supplementary material for: Reversible wrinkles of monolayer graphene on a polymer substrate: toward stretchable and flexible electronics
Source: Royal Society of Chemistry journal article supplement (doi:10.1039/c6sm00108d), 2016-01-01
Supplement: c6sm00108d1.pdf [file c6sm00108d1.pdf]

ELECTRONIC SUPPLEMENTARY INFORMATION (ESI)

**Reversible Wrinkles of Monolayer Graphene on a Polymer  
Substrate: Toward Stretchable and Flexible Electronics**

**Ying Li**

Department of Mechanical Engineering & Institute of Materials Science, University of  
Connecticut, Storrs, CT, USA

E-mail: [yingli@engr.uconn.edu](mailto:yingli@engr.uconn.edu)

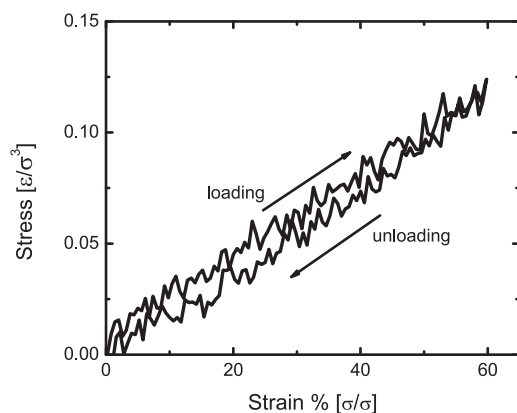

**Figure S1.** Stress-strain curve of the crosslinked polymer substrate under equal-biaxial tension. The strain rate is about  $2 \times 10^{-5} \tau^{-1}$ .

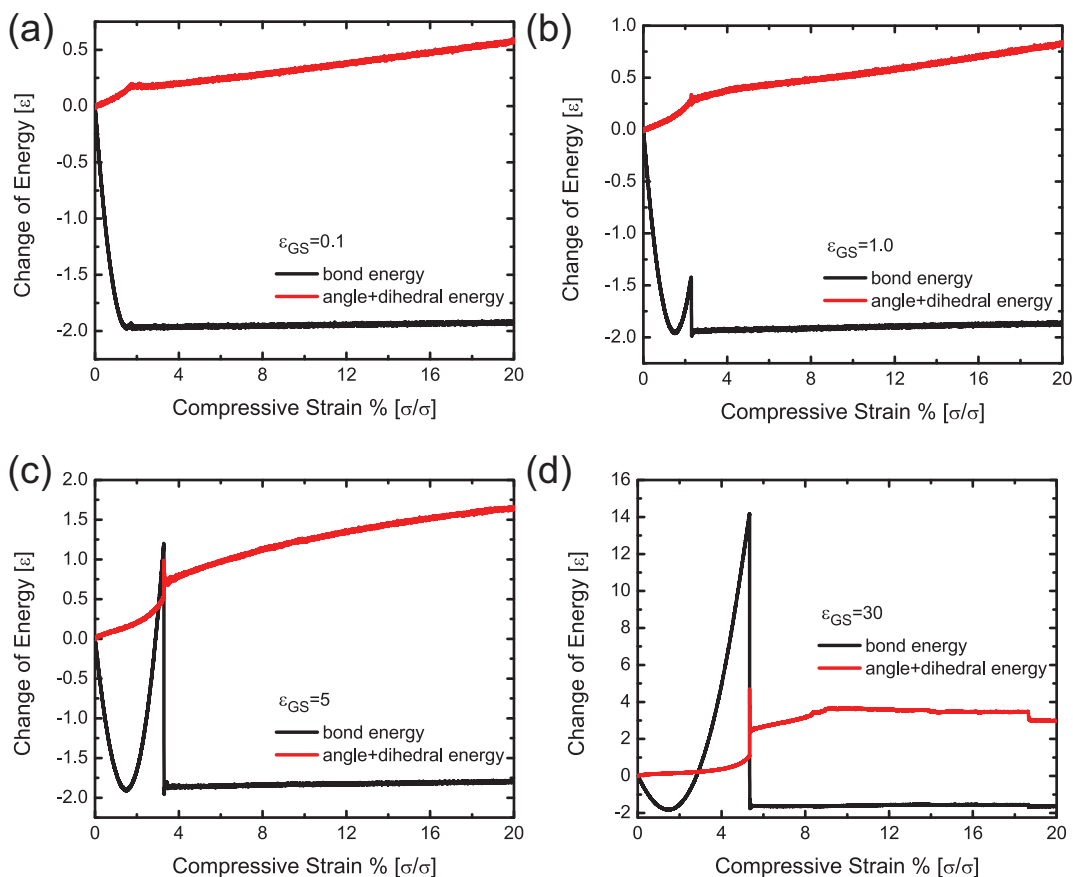

**Figure S2.** Energy change of monolayer graphene supported by a rigid substrate under equal-biaxial compression. The change of bond energy represents the in-plane stretching energy change. While the bending energy change is denoted by the change of angle and dihedral energies.

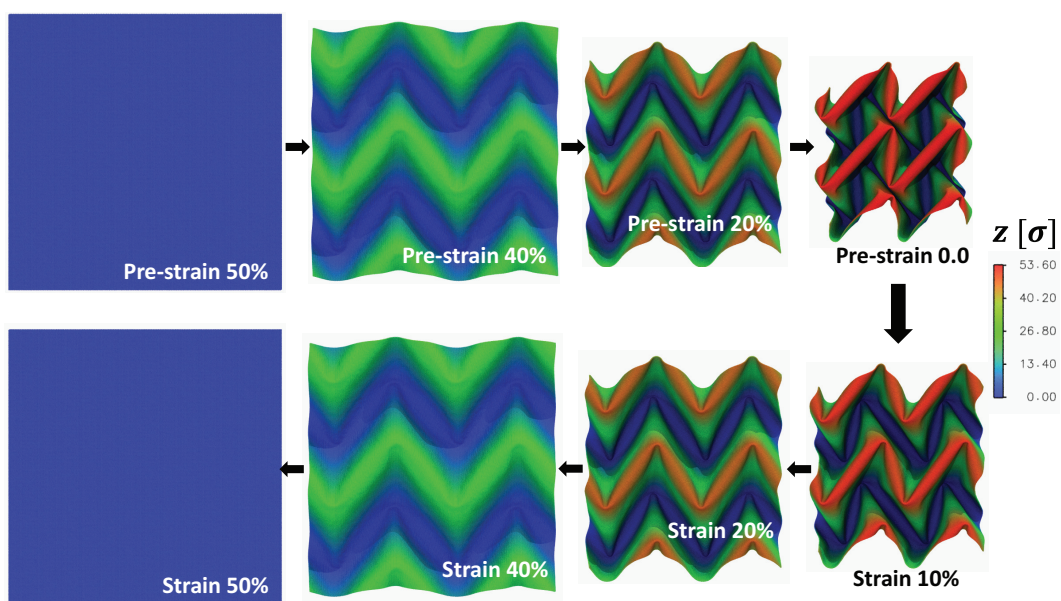

**Figure S3.** Snapshots of monolayer graphene supported by a pre-strained soft (polymer) substrate. The marked strain represents the strain level within polymer substrate. The coarse-grained carbon atoms are colored according to their out-of-plane ( $z$  direction) displacement. Interaction between graphene and polymer substrate is determined by the pair parameter  $\epsilon_{GS} = 1.0$ .

**Video 1.mp4:** Monolayer graphene supported by a rigid (non-deformable) substrate under equal-biaxial compression. Interaction between graphene and rigid substrate is determined by the pair parameter  $\epsilon_{wall} = 5.0$ .

**Video 2.mp4:** Monolayer graphene supported by a soft (polymer) substrate under equal-biaxial compression. Interaction between graphene and polymer substrate is determined by the pair parameter  $\epsilon_{GS} = 5.0$ .

**Video 3.mp4:** Monolayer graphene supported by a pre-strained polymer substrate during relaxation of pre-strain within substrate. Interaction between graphene and polymer substrate is determined by the pair parameter  $\epsilon_{GS} = 10$ .

**Video 4.mp4:** Monolayer graphene supported by a pre-strained polymer substrate during equal-biaxial stretching of substrate. Interaction between graphene and polymer substrate is determined by the pair parameter  $\epsilon_{GS} = 10$ .
